# Supplementary material for: One-pot preparation of dextran-capped gold nanoparticles at room temperature and colorimetric detection of dihydralazine sulfate in uric samples
Source: Royal Society of Chemistry journal article supplement (doi:10.1039/c0ay00470g), 2010-01-01
Supplement: c0ay00470g.pdf [file c0ay00470g.pdf]

## Electronic Supporting Information

*for*

### **One-pot preparation of dextran-capped gold nanoparticles at room temperature and colorimetric detection of dihydralazine sulfate in uric samples**

Yi Wang,<sup>a</sup> Lei Zhan<sup>b</sup> and Cheng Zhi Huang<sup>\*,a,b</sup>

<sup>a</sup> Education Ministry Key Laboratory on Luminescence and Real-Time Analysis, College of Chemistry and Chemical Engineering, <sup>b</sup> College of Pharmaceutical Sciences, Southwest University, Chongqing 400715, PR China.

#### **Preparation of citrate- and CTAB-capped AuNPs**

Citrate-capped AuNPs were prepared by citrate-reduced method. In detail, 48.0 mL of Milli-Q purified water and 2.0 mL of 1.0% (w/w) HAuCl<sub>4</sub> were mixed in a flask. The mixture was then heated under magnetic stirring until it began to boil, and 1.0 mL of 5.0% (w/w) trisodium citrate was quickly added to the solution, which should change from pale yellow to deep red with about 3 min. After boiling for another 5 min, the solution was cooled to room temperature (25 °C) under vigorous magnetic stirring.

CTAB-capped Au-NPs were synthesized by seed-mediated method with two-step procedures. Firstly, 5.0 mL solution of gold seeds was prepared in manner of reducing  $2.5 \times 10^{-4} \text{ mol}\cdot\text{L}^{-1}$  HAuCl<sub>4</sub> with freshly prepared  $3.0 \times 10^{-3} \text{ mol}\cdot\text{L}^{-1}$  ice-cold NaBH<sub>4</sub> in the

presence of  $7.5 \times 10^{-2} \text{ mol}\cdot\text{L}^{-1}$  CTAB. After mixed vigorously for about 30 s, the mixture rapidly developed into light-brown suspension. This mixture could be used as seeds for further synthesis of Au-NPs after 2 h aging. Secondly, 10.0 mL growth solution was prepared by the reduction of  $2.0 \times 10^{-4} \text{ mol}\cdot\text{L}^{-1}$   $\text{HAuCl}_4$  with freshly prepared  $6.0 \times 10^{-3} \text{ mol}\cdot\text{L}^{-1}$  L-AA in the presence of  $1.6 \times 10^{-3} \text{ mol}\cdot\text{L}^{-1}$  CTAB and gently mixed by inversion, with the colour changing from orange to colourless immediately, then followed by adding 2 h-aged gold seed solution prepared in the first step, inverted once more, and then the color of mixture became red gradually. At last, the mixture was left undisturbed for 24 h.

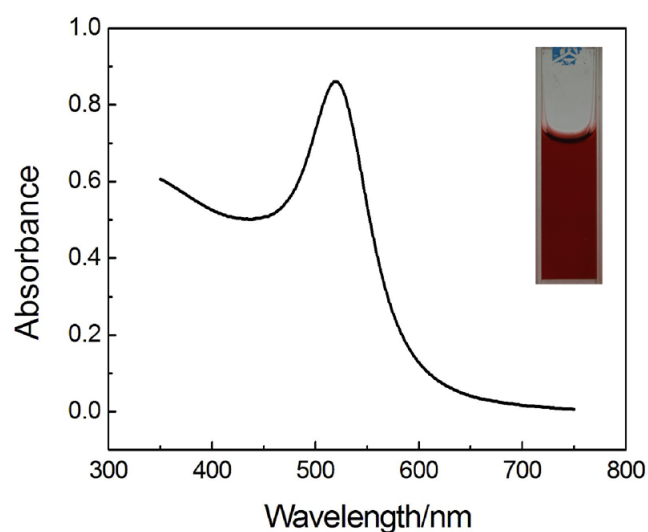

**Fig. S1** UV-vis absorption spectra and solution color of dextran-capped AuNPs.

**Table S1 Tolerance of foreign substances**

| Substance          | Concentration<br>( $\mu\text{mol}\cdot\text{L}^{-1}$ ) | Change in<br>$A_{650}/A_{520}$ (%) | Substance                             | Concentration<br>( $\mu\text{mol}\cdot\text{L}^{-1}$ ) | Change in<br>$A_{650}/A_{520}$ (%) |
|--------------------|--------------------------------------------------------|------------------------------------|---------------------------------------|--------------------------------------------------------|------------------------------------|
| Glucose            | 400                                                    | 5.5                                | Carbamide                             | 400                                                    | 2.3                                |
| Sucrose            | 400                                                    | 4.4                                | Isoniazid                             | 400                                                    | 0.7                                |
| Lactose            | 400                                                    | -1.8                               | Hydrazine<br>sulfate                  | 400                                                    | -2.3                               |
| Maltose            | 400                                                    | -6.3                               | Vitamin b12                           | 400                                                    | -1.8                               |
| Fructose           | 200                                                    | -9.3                               | $\text{K}^+$ , $\text{Cl}^-$          | 400                                                    | -5.0                               |
| Glycin             | 400                                                    | -6.2                               | $\text{Na}^+$ , $\text{PO}_4^{3-}$    | 400                                                    | 2.5                                |
| L-Glutamic<br>acid | 400                                                    | -2.2                               | $\text{Mg}^{2+}$ , $\text{Cl}^-$      | 80                                                     | 7.6                                |
| L-Serine           | 400                                                    | -6.2                               | $\text{Ca}^{2+}$ , $\text{Cl}^-$      | 80                                                     | 5.6                                |
| L-Arginine         | 40                                                     | -6.3                               | $\text{Zn}^{2+}$ , $\text{SO}_4^{2-}$ | 40                                                     | 3.1                                |
| Citric acid        | 400                                                    | 8.2                                | $\text{Cu}^{2+}$ , $\text{SO}_4^{2-}$ | 20                                                     | -9.6                               |
| Oxalic acid        | 400                                                    | 1.1                                | $\text{Al}^{3+}$ , $\text{SO}_4^{2-}$ | 80                                                     | 9.6                                |

Concentrations: AuNPs,  $2.5 \text{ nmol}\cdot\text{L}^{-1}$ ; DHZS,  $4.0 \mu\text{mol}\cdot\text{L}^{-1}$ ; NaCl,  $90 \text{ mmol}\cdot\text{L}^{-1}$ ; pH, 8.6.
